# Supplementary material for: Room-temperature controllable synthesis of hierarchically flower-like hollow covalent organic frameworks for brain natriuretic peptide enrichment
Source: Royal Society of Chemistry journal article supplement (doi:10.1039/d1cc02646a), 2021-01-01
Supplement: d1cc02646a1.pdf [file d1cc02646a1.pdf]

## Supporting Information

### **Room-Temperature Controllable Synthesis of Hierarchically Flower-like Hollow Covalent Organic Frameworks for Brain Natriuretic Peptide Enrichment**

Wende Ma, Guorong Li, Chao Zhong, Yixin Yang, Qianqian Sun, Dan Ouyang, Wei Tong, Wenchang Tian, Lan Zhang, and Zian Lin\*

Ministry of Education Key Laboratory of Analytical Science for Food Safety and Biology, Fujian Provincial Key Laboratory of Analysis and Detection Technology for Food Safety, College of Chemistry, Fuzhou University, Fuzhou, Fujian, 350116, China.

**Corresponding author: Zian Lin**

**Postal address: College of Chemistry, Fuzhou University**

**2# Xueyuan Road, Qishan Campus, Fuzhou, Fujian 350116, P. R. China**

**Fax: +86-591-22866135**

**KEYWORDS:** Controllable Synthesis, Flower-like Hollow Covalent Organic Frameworks, Room Temperature, Enrichment, Brain Natriuretic Peptide

## EXPERIMENTAL SECTION

**Materials.** All chemicals and reagents were analytical grade or better and used without further purification. 1,3,5-Tris(4-aminophenyl)benzene (TPB), 2,5-divinylterephthalaldehyde (DVA), 2,5-dimethoxyterephthalaldehyde, 2,5-bis(2-propyn-1-yloxy)-1,4-benzenedicarboxaldehyde, 2,5-bis(4,4,5,5-tetramethyl-1,3,2-dioxaborolan-2-yl)terephthalaldehyde, 2,5-dibutoxy-benzene-1,4-dicarbaldehyde, 2,5-bis-hexyloxy-benzene-1,4-dicarbaldehyde, 2,5-dioctoxyterephthalaldehyde, benzene-1,3,5-tricarbaldehyde, and 2,4,6-trimethoxy-1,3,5-benzenetricarbaldehyde were obtained from Jilin Chinese Academy of Sciences - Yanshen Technology Co., Ltd. Sodium tetrachloroaurate(III) dehydrate ( $\text{NaAuCl}_4 \cdot 2\text{H}_2\text{O}$ ), sodium citrate (SC), tannic acid (TA), and potassium carbonate ( $\text{K}_2\text{CO}_3$ ) were purchased from Aladdin Chemistry Co., Ltd (Shanghai, China). BNP ( $M_w = 3464.4$ ) was obtained from Guotai Biotechnology Co. Ltd (Hefei, China). Deionized water ( $18.2 \text{ M}\Omega \text{ cm}^{-1}$ ) was produced by Milli-Q water purification system (Millipore, USA). Human serum samples were kindly donated by Fujian Provincial Governmental Hospital (Fuzhou, China). The protocol and written informed consent were approved by the Fujian Province Official Hospital Ethics Committee.

**Instrumentation.** Dynamic light scattering (DLS) data were recorded on NanoPlus3 nanoparticle size and zeta potential analyzer by using ethanol as the dispersion solution. Field emission scanning electron microscopies (SEM) images were obtained by a Verios G4 microscope equipment. Transmission Electron Microscopy (TEM) images were acquired on Hitachi HT7700 and FEI Talos F200S G2. Fourier transform infrared

(FT-IR) spectra of the solid samples were taken on a BD FACSCanto (TM) II spectrometer.  $^{13}\text{C}$  ssNMR spectrums were collected at a Bruker (11.7T/500MHz)/AVANCE III 500 spectrometer. PXRD was carried out on a CEM DY5261/Xpert3 X-ray diffractometer, and the corresponding data were collected in the range of  $2\theta = 1.5\text{-}30^\circ$  at a scan rate of  $2^\circ \text{ min}^{-1}$ .  $\text{N}_2$  adsorption-desorption isotherms were measured on a Micromeritics ASAP 2020 automatic volumetric instrument at 77 K. The samples were degassed at  $150^\circ\text{C}$  for 8 h under vacuum before measurement. The surface areas were calculated from the adsorption data using Brunauer-Emmett-Teller (BET) model. The pore-size-distribution curve were obtained using the non-localized density functional theory (NLDFT). Thermogravimetric analysis (TGA) was carried out on a STA449C/6/G analyzer from 30 to  $1000^\circ\text{C}$  under  $\text{Ar}_2$  atmosphere with a ramp rate of  $10^\circ\text{C min}^{-1}$ .

Mass spectra were obtained by a MALDI-TOF/TOF MS system (Bruker Daltonics, Bremen, Germany) with a Nd: YAG laser at 355 nm, a repetition rate of 2000 Hz, and an acceleration voltage of 20 kV.

**Synthesis of HFH-COF-1 with different sizes.** TPB (0.04 mmol) and DVA (0.06 mmol) were individually dissolved in 5 mL of ACN solvent (92%) containing 1.9, 2.4, 2.9, and 3.4 M HAc, respectively. Subsequently, the mixture was sonicated for 1 min and incubated at room temperature for 72 h. The obtained yellow precipitates were collected by centrifugation at 10000 rpm for 3 min and washed with dry THF and ethanol for three times, respectively.

**Synthesis of HFH-COF-1 in different proportion of ACN solvent.** TPB (0.04 mmol) and DVA (0.06 mmol) were dissolved in ACN solvent (5 mL, containing 1.9 M HAc) with different proportion (100, 96, 92, 90, 88, 86, 84, 82, and 80%) and sonicated for 1 min and allowed to stand at room temperature for 72 h. The obtained yellow precipitates were collected by centrifugation at 10000 rpm for 3 min and washed with dry THF and ethanol for three times, respectively. Then the powders were dried under high vacuum for 24 h.

**Synthesis of HFH-COF-1 at different time intervals.** TPB (0.04 mmol) and DVA (0.06 mmol) were dissolved in 5 mL of ACN solvent (92%) containing 2.4 M HAc. Subsequently, the mixture was sonicated for 1 min and the individual sample was removed after specified time intervals (12 h, 24 h, 48 h, and 72 h). The precipitates were collected and dried in a similar condition as described before. The obtained materials were further characterized by TEM, SEM, BET, and PXRD.

**Synthesis of other eight HFH-COFs.** Synthesis of HFH-COF-2: TPB (0.04 mmol) and 2,5-dimethoxyterephthalaldehyde (0.06 mmol) were dissolved in 5 mL of ACN solvent (92%) containing 1.2 M HAc and the subsequent operation was same as mentioned above. Similarly, HFH-COF-3 was synthesized under conditions of TPB (0.04 mmol), 2,5-bis(2-propyn-1-yloxy)-1,4-benzenedicarboxaldehyde (0.06 mmol), 5 mL of ACN solvent (92%) containing 1.45 M HAc. HFH-COF-4 was synthesized under conditions of TPB (0.04 mmol), 2,5-bis(4,4,5,5-tetramethyl-1,3,2-dioxaborolan-2-yl)terephthalaldehyde (0.06 mmol), 5 mL of ACN solvent (92%) containing 1.9 M HAc. HFH-COF-5 was synthesized under conditions of TPB (0.04 mmol), 2,5-

dibutoxy-benzene-1,4-dicarbaldehyde (0.06 mmol), 5 mL of ACN solvent (92%) containing 1.9 M HAc. HFH-COF-6 was synthesized under conditions of TPB (0.04 mmol), 2,5-bis-hexyloxy-benzene-1,4-dicarbaldehyde (0.06 mmol), 5 mL of ACN solvent (92%) containing 2.4 M HAc. HFH-COF-7 was synthesized under conditions of TPB (0.04 mmol), 2,5-dioctoxyterephthalaldehyde (0.06 mmol), 5 mL of ACN solvent (92%) containing 2.4 M HAc. HFH-COF-8 was synthesized under conditions of TPB (0.04 mmol), 2,4,6-trimethoxy-1,3,5-benzenetricarbaldehyde (0.04 mmol), 5 mL of ACN solvent (92%) containing 1.9 M HAc. HFH-COF-9 was synthesized under conditions of TPB (0.04 mmol), benzenedicarboxaldehyde (0.04 mmol), 5 mL of ACN solvent (92%) containing 2.4 M HAc.

**Synthesis of Au nanoparticles.** The products were prepared according to the previous literature with some modification.<sup>[1]</sup> A 75 mL of freshly prepared reducing solution of sodium citrate (SC, 48.75 mg) containing tannic acid (TA, 0.21 mg) and potassium carbonate ( $K_2CO_3$ , 10.5 mg) was heated with a heating mantle in a 150 mL round-bottom flask under vigorous stirring. When the temperature reached 70 °C, 1.0 mL of deionized water contained sodium tetrachloroaurate(III) dihydrate ( $NaAuCl_4 \cdot 2H_2O$ , 4.97mg) was injected. The solution was kept at 70 °C for 10 min to ensure complete reaction of the gold precursor.

**Synthesis of HFH-COF-1@Au.** The 20 mg of HFH-COF-1 was added into 4 mL of deionized water and the mixture was sonicated for 10 min to completely disperse the HFH-COF-1. Afterwards, 1.0 mL of deionized water contained 1.0 mg, 1.5 mg, 2.0 mg,

and 2.5 mg  $\text{NaAuCl}_4 \cdot 2\text{H}_2\text{O}$  was individually added to the above mixture solution and the tube were shaken vigorously for 30 min.

A 50 mL of freshly prepared reducing solution of sodium citrate (SC, 32.5 mg) containing tannic acid (TA, 0.14 mg) and potassium carbonate ( $\text{K}_2\text{CO}_3$ , 7.0 mg) was heated with a water bath in a 100 mL round-bottom flask under vigorous stirring. When the temperature reached 70 °C, the prepared above turbid solution was injected. The solution was kept at 70 °C under vigorous stirring for 10 min. The solid product was then filtered then washed three times water. Finally, the obtained product was dried in a vacuum oven at 60 °C for 24 h.

**Adsorption performance evaluation of HFH-COF-1@Au.** The adsorption experiments were carried out in a centrifuge tube under ambient conditions. Deionized water as the solvent of all sample solution. In the experiments, 1.0 mg of HFH-COF-1@Au (or Au nanoparticles or HFH-COF-1) were vortex-mixed with 1.0 mL of BNP solution (10 fmol/ $\mu\text{L}$ ) for 15 min. Then the mixture solutions were centrifuged at 10000 rpm and the supernatants were collected. The BNP-captured HFH-COF-1@Au (or Au nanoparticles or HFH-COF-1) were eluted with 10  $\mu\text{L}$  DHB (30 mg/mL, 50%ACN:49% $\text{H}_2\text{O}$ :1% $\text{H}_3\text{PO}_4$ ) for 30 min. The supernatants and the eluates were analyzed by using MALDI-TOF-MS, respectively. The eluate of DHB (1  $\mu\text{L}$ ) was deposited as the matrix. The mass spectra were obtained in reflection positive mode.

To optimize the eluent conditions, 1.0 mg of HFH-COF-1@ Au was vortex-mixed with 1.0 mL of BNP solution (1.0 fmol/ $\mu\text{L}$ ) for 15 min. Then the BNP-captured HFH-COF-1@Au was eluted with 5  $\mu\text{L}$ , 10  $\mu\text{L}$ , and 15  $\mu\text{L}$  DHB (30 mg/mL,

50%ACN:49%H<sub>2</sub>O:1%H<sub>3</sub>PO<sub>4</sub>) for 30 min, respectively, and the eluates were analyzed with MALDI-TOF-MS.

To evaluate the sensitivity, the standard BNP with different concentrations (1 fmol/μL, 0.1 fmol/μL, and 0.02 fmol/μL) were prepared with deionized water (1 mL). Then, the adsorption experiments were the same as above and the eluate was analyzed with MALDI-TOF-MS.

**Enrichment of BNP from human serum.** In the experiments, 10-fold diluted human serum (1 mL) were incubated with the HFH-COFs-1@Au (1.0 mg) for 15 min. After centrifugation, the supernatants were removed and washed with 50% ACN PBS buffer (20 mM) and water two times, respectively. The peptide-captured HFH-COFs-1@Au were eluted with 10 μL eluent (DHB). Finally, the eluate was analyzed by MALDI-TOF-MS analysis.

[1] J. Piella, N.G. Bastus and V. Puntès, *Chem. Mater.* 2016, **28**, 1066-1075.

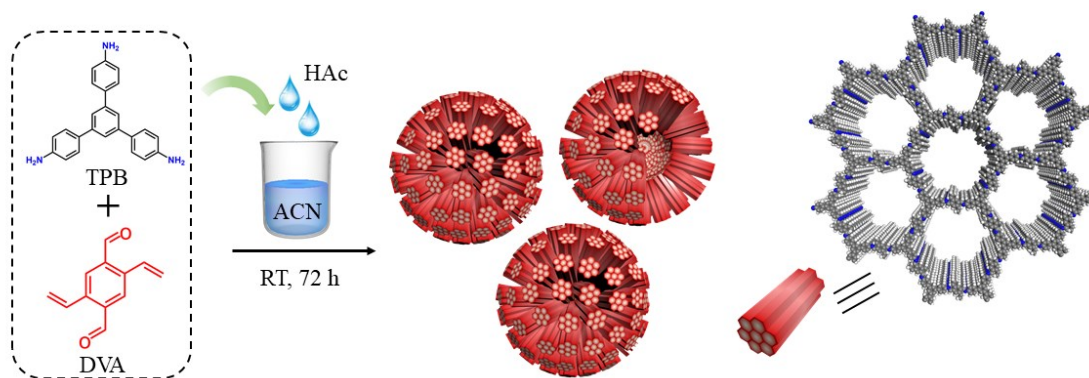

**Scheme S1.** Room-temperature controllable synthesis of hierarchically flower-like hollow COFs (HFH-COF-1).



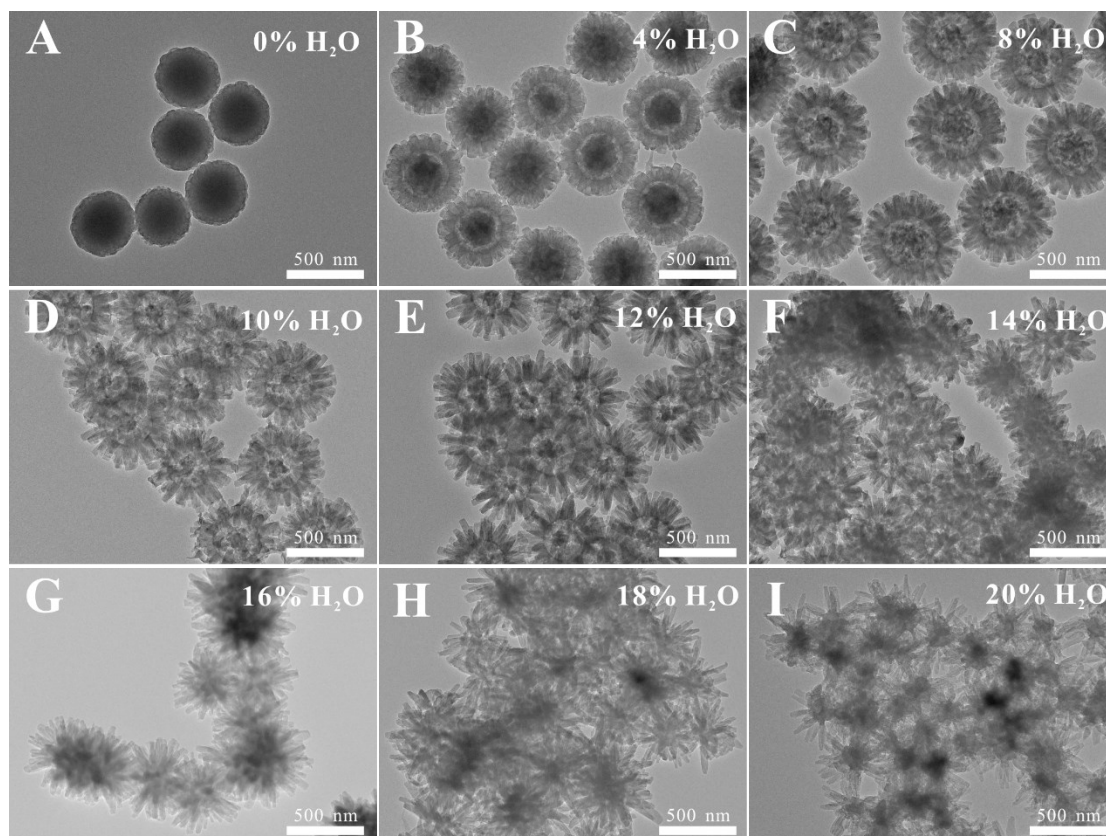

**Figure S1.** TEM images of COFs prepared with different proportion of H<sub>2</sub>O in ACN solvent: (A) 0% H<sub>2</sub>O, (B) 4% H<sub>2</sub>O, (C) 8% H<sub>2</sub>O, (D) 10% H<sub>2</sub>O, (E) 12% H<sub>2</sub>O, (F) 14% H<sub>2</sub>O, (G) 16% H<sub>2</sub>O, (H) 18% H<sub>2</sub>O, (I) 20% H<sub>2</sub>O, respectively.

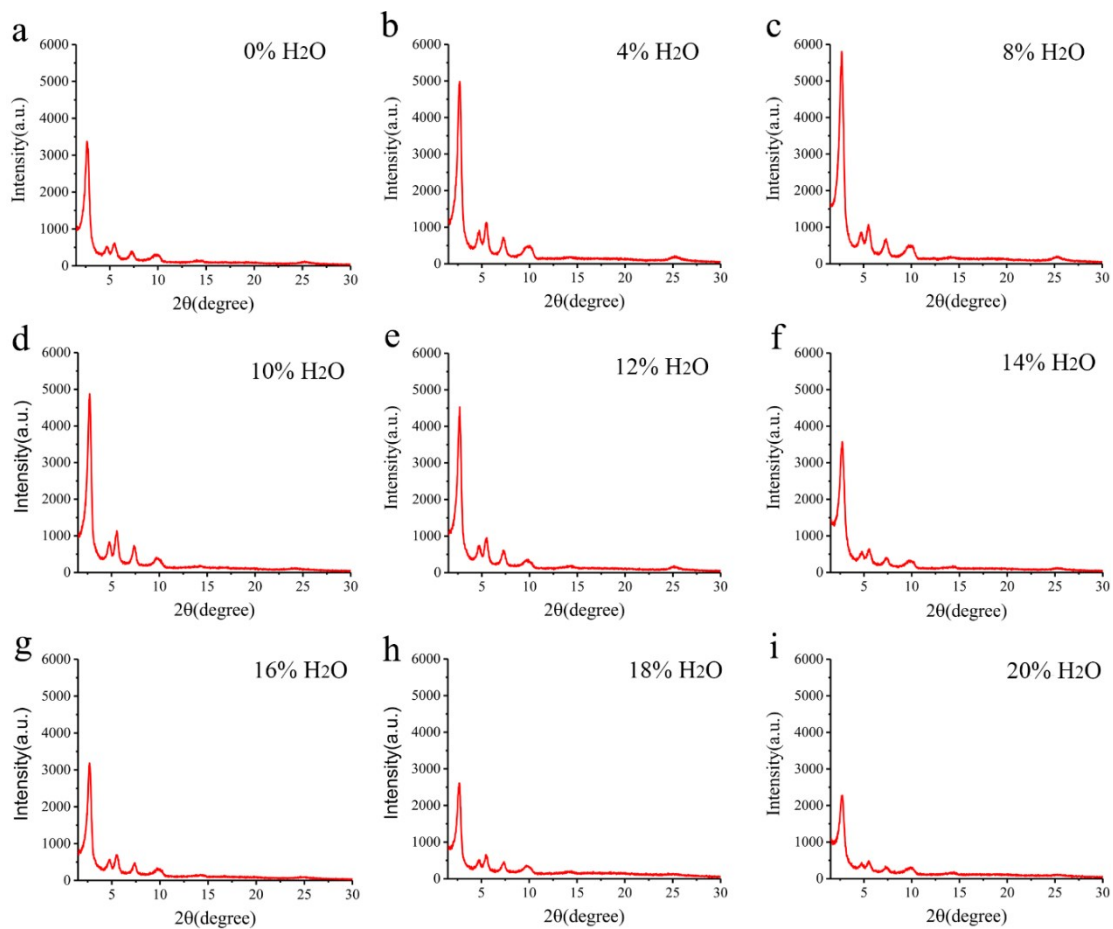

**Figure S2.** PXR D analysis of the COFs prepared in different proportion of H<sub>2</sub>O in ACN solvent (5 mL): (a) 0% H<sub>2</sub>O, (b) 4% H<sub>2</sub>O, (c) 8% H<sub>2</sub>O, (d) 10% H<sub>2</sub>O, (e) 12% H<sub>2</sub>O, (f) 14% H<sub>2</sub>O, (g) 16% H<sub>2</sub>O, (h) 18% H<sub>2</sub>O, (i) 20% H<sub>2</sub>O, respectively.

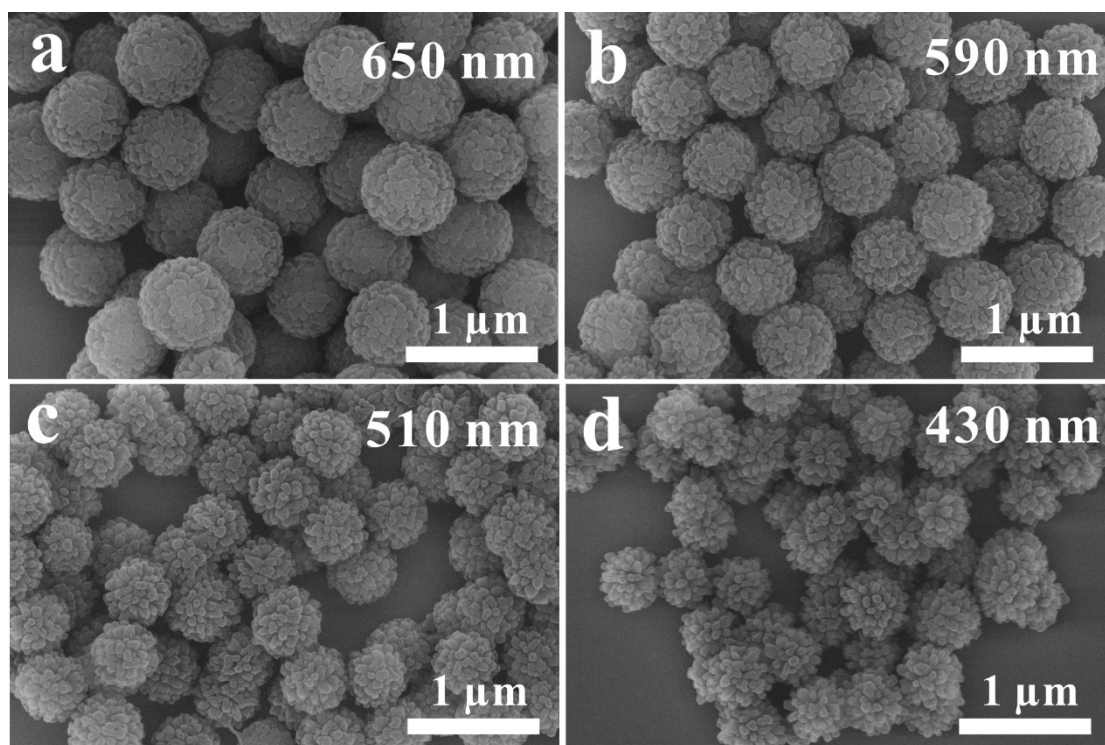

**Figure S3.** SEM images of the uniform HFH-COF-1 prepared with 1.9, 2.4, 2.9, and 3.4 M HAc, and the corresponding sizes: a) 650 nm, b) 590 nm, c) 510 nm, d) 430 nm.

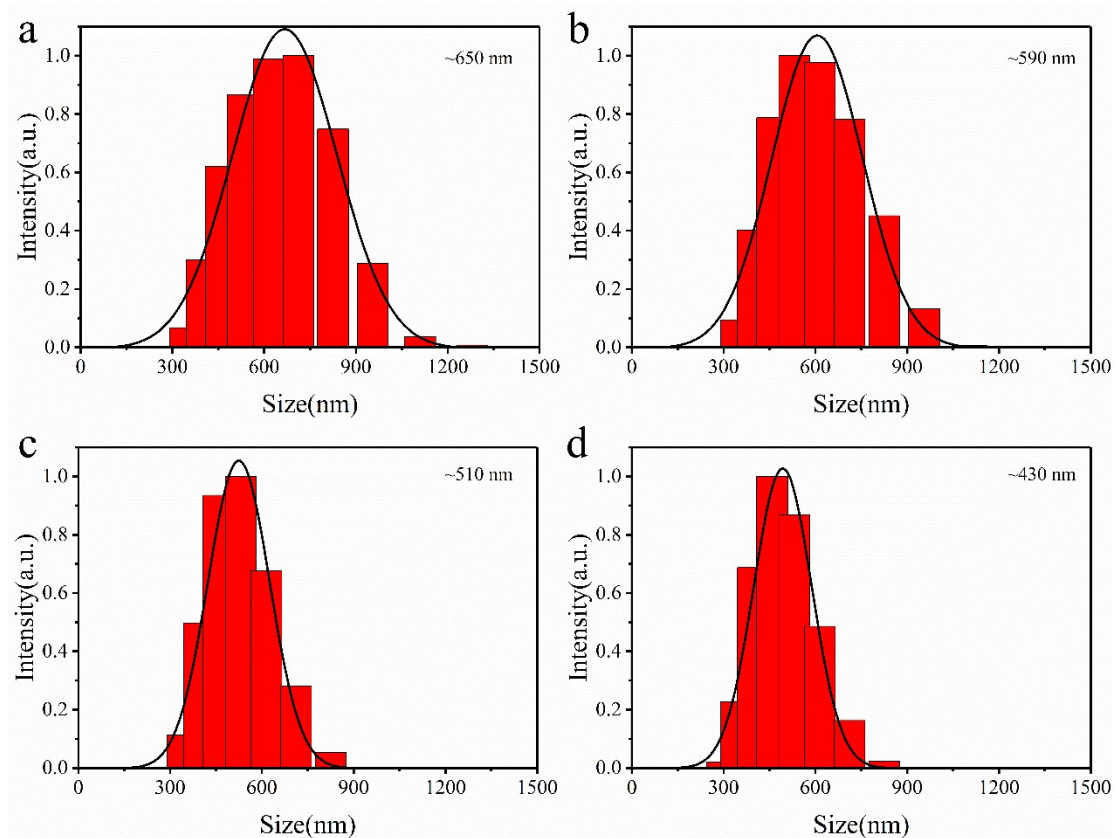

**Figure S4.** The DLS analysis of HFH-COFs-1 with different sizes (a: size of 650 nm, b: size of 590 nm, c: size of 510 nm, d: size of 430 nm).

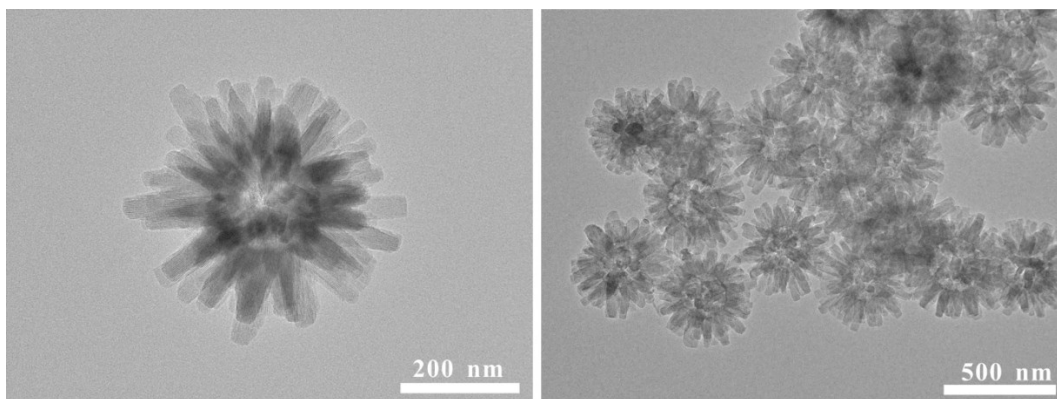

**Figure S5.** The TEM images of HFH-COFs-1 prepared with 3.9 M HAc.

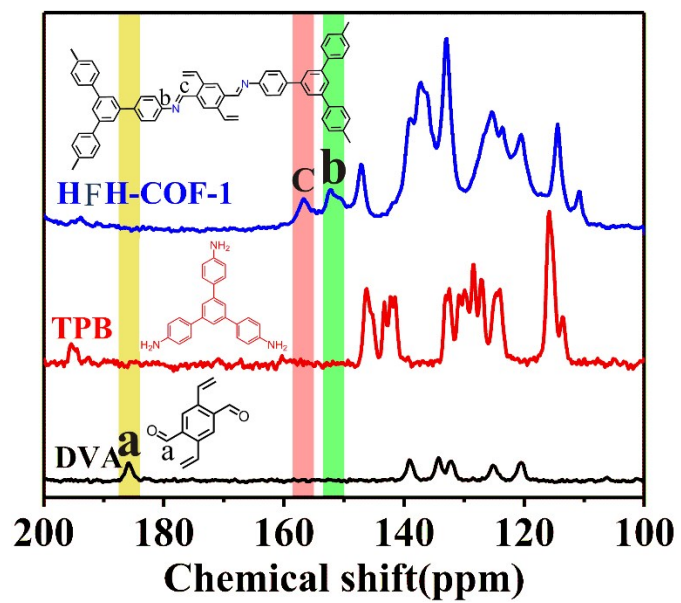

**Figure S6.** Comparison of solid-state <sup>13</sup>C NMR spectra of HFH-COF-1 with the monomers.

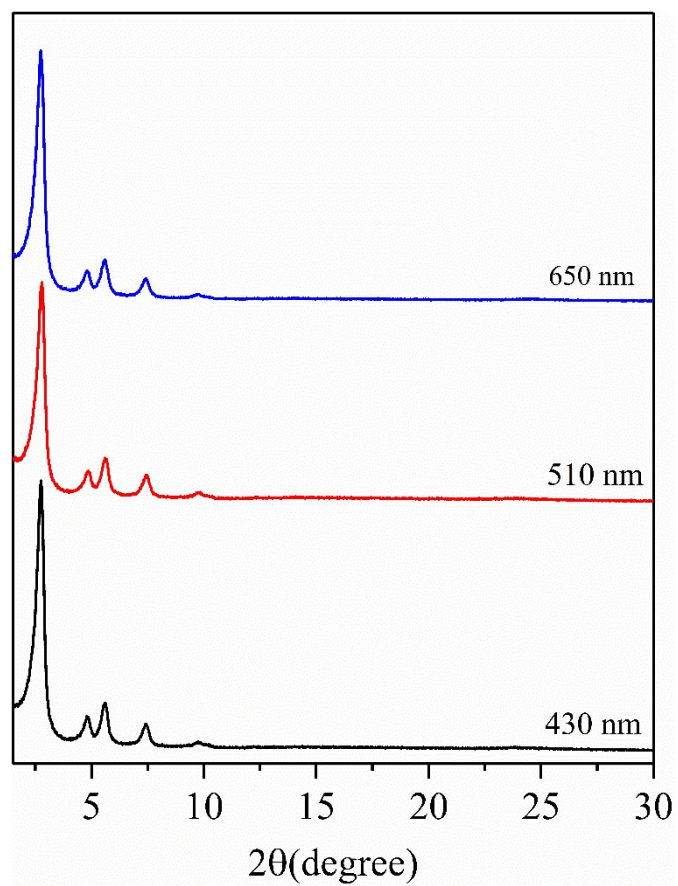

**Figure S7.** PXRD analysis of HFH-COFs-1 with different sizes (650 nm, 510 nm, and 430 nm).

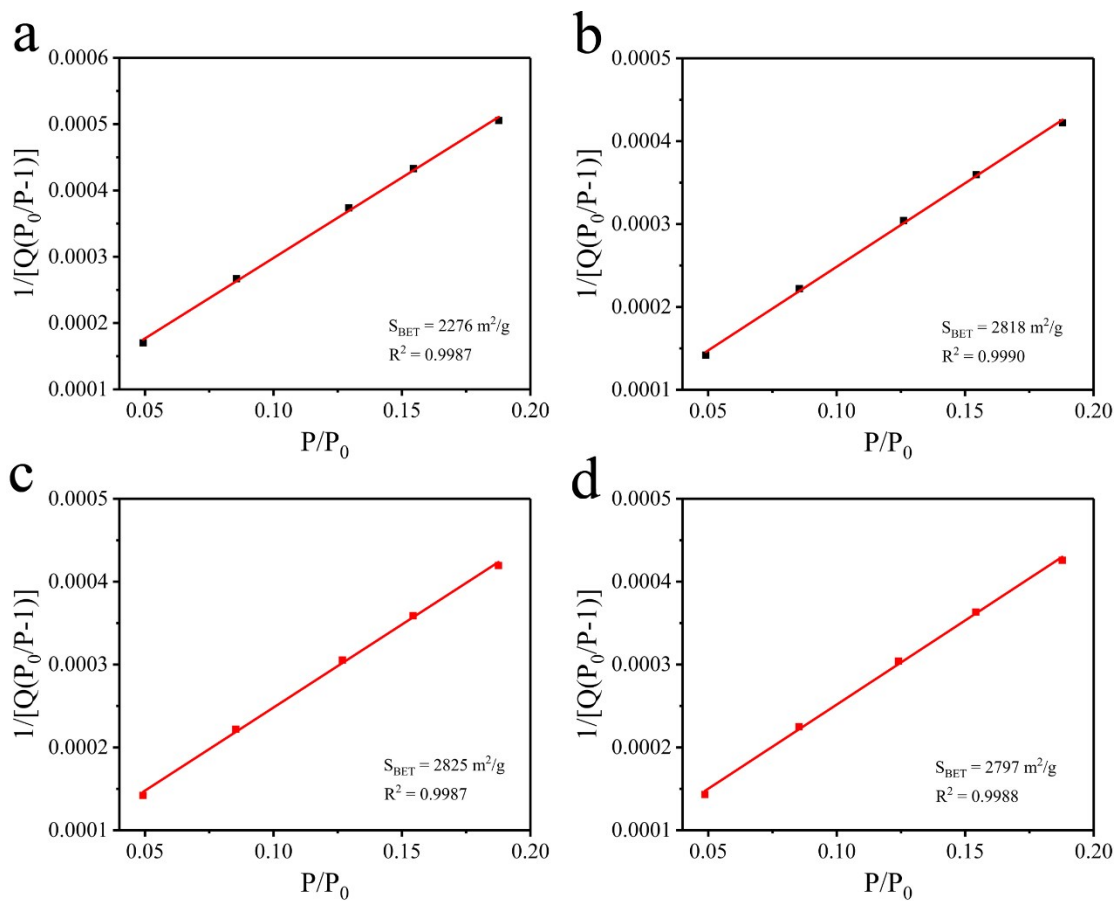

**Figure S8.** BET plot for the different-size HFH-COF-1 (a: size of 650 nm, b: size of 590 nm, c: size of 510 nm, d: size of 430 nm).



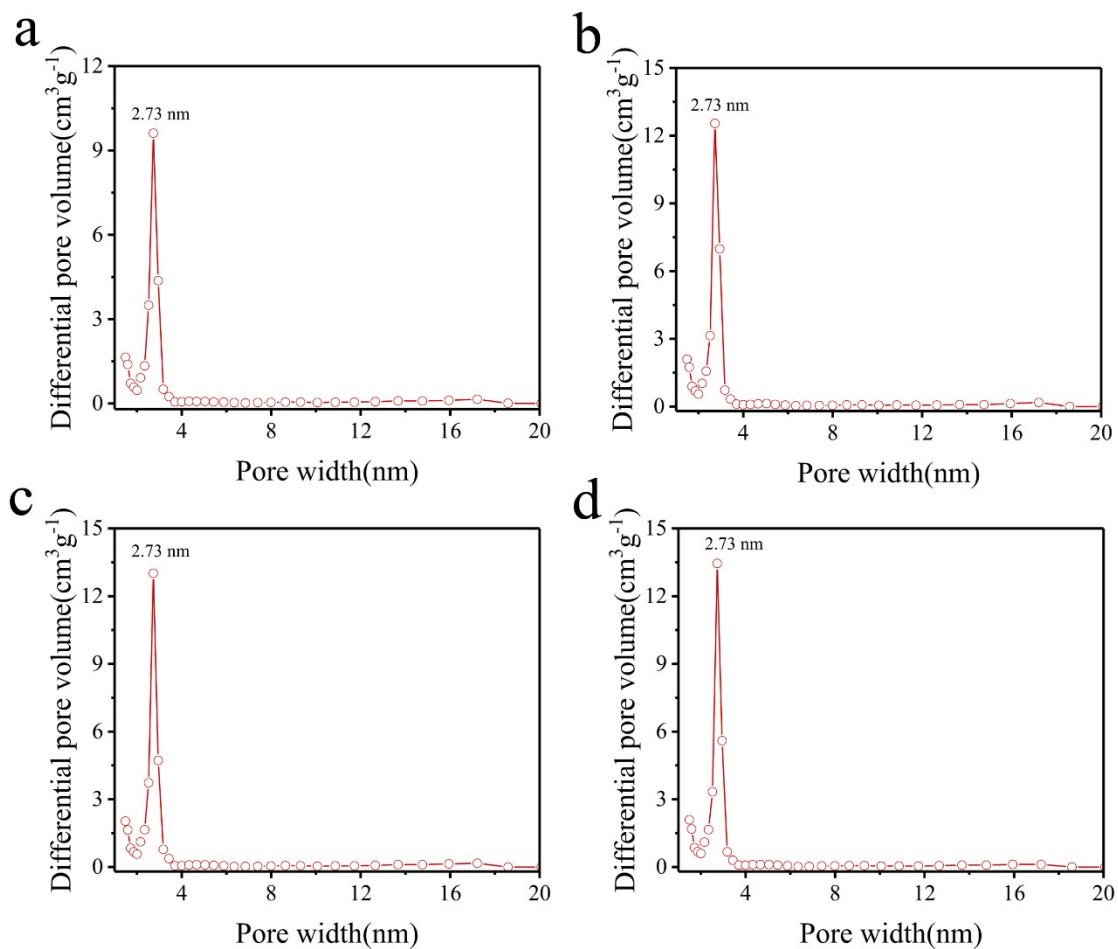

**Figure S9.** Pore size distribution profiles of HFH-COF-1 with different sizes (a: size of 650 nm, b: size of 590 nm, c: size of 510 nm, d: size of 430 nm). Pore size distributions of the HFH-COF-1 were calculated by using the NLDFIT model.

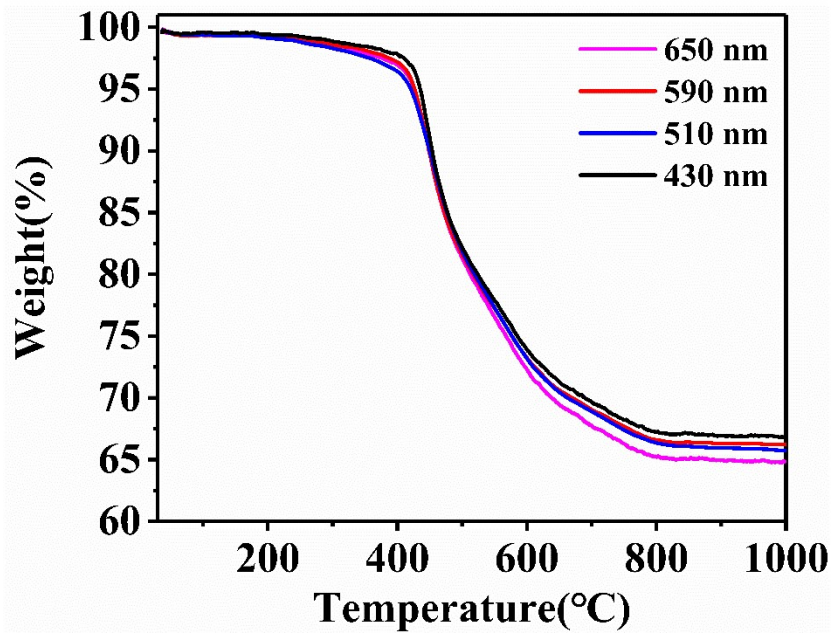

**Figure S10.** TGA curves of HFHCOF-1 with different sizes.

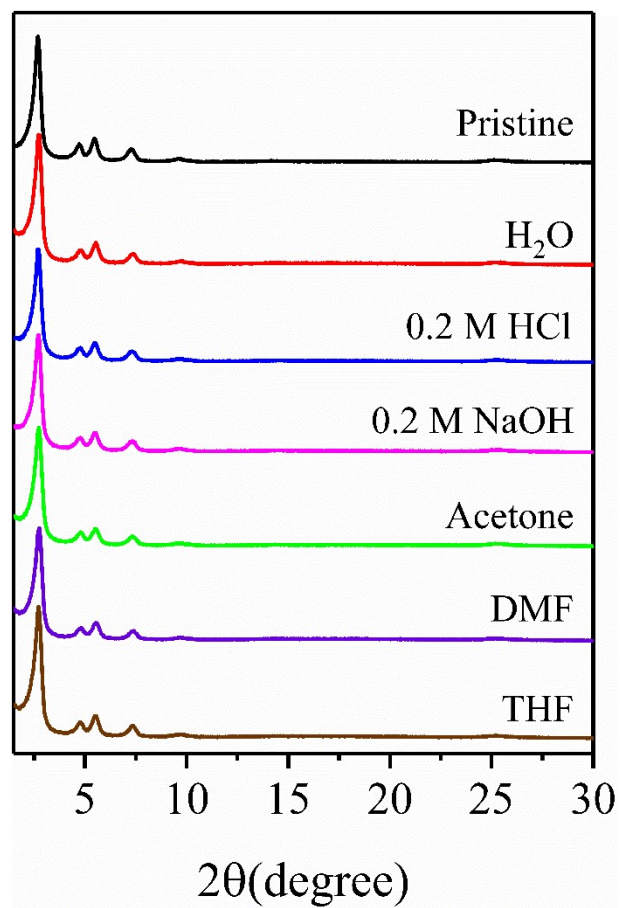

**Figure S11.** PXRD patterns of the HFH-COF-1 after treatment with different solvents for 48 h.

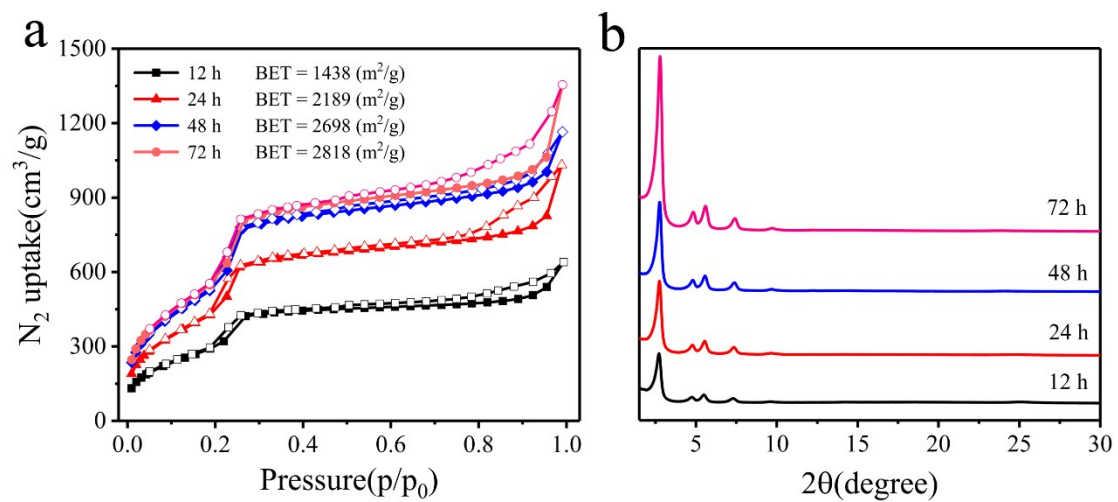

**Figure S12.** Time dependent BET and PXRD analysis of the formation of HFH-COF-1, reaction quenched after 12 h, 24 h, 48 h, and 72 h.

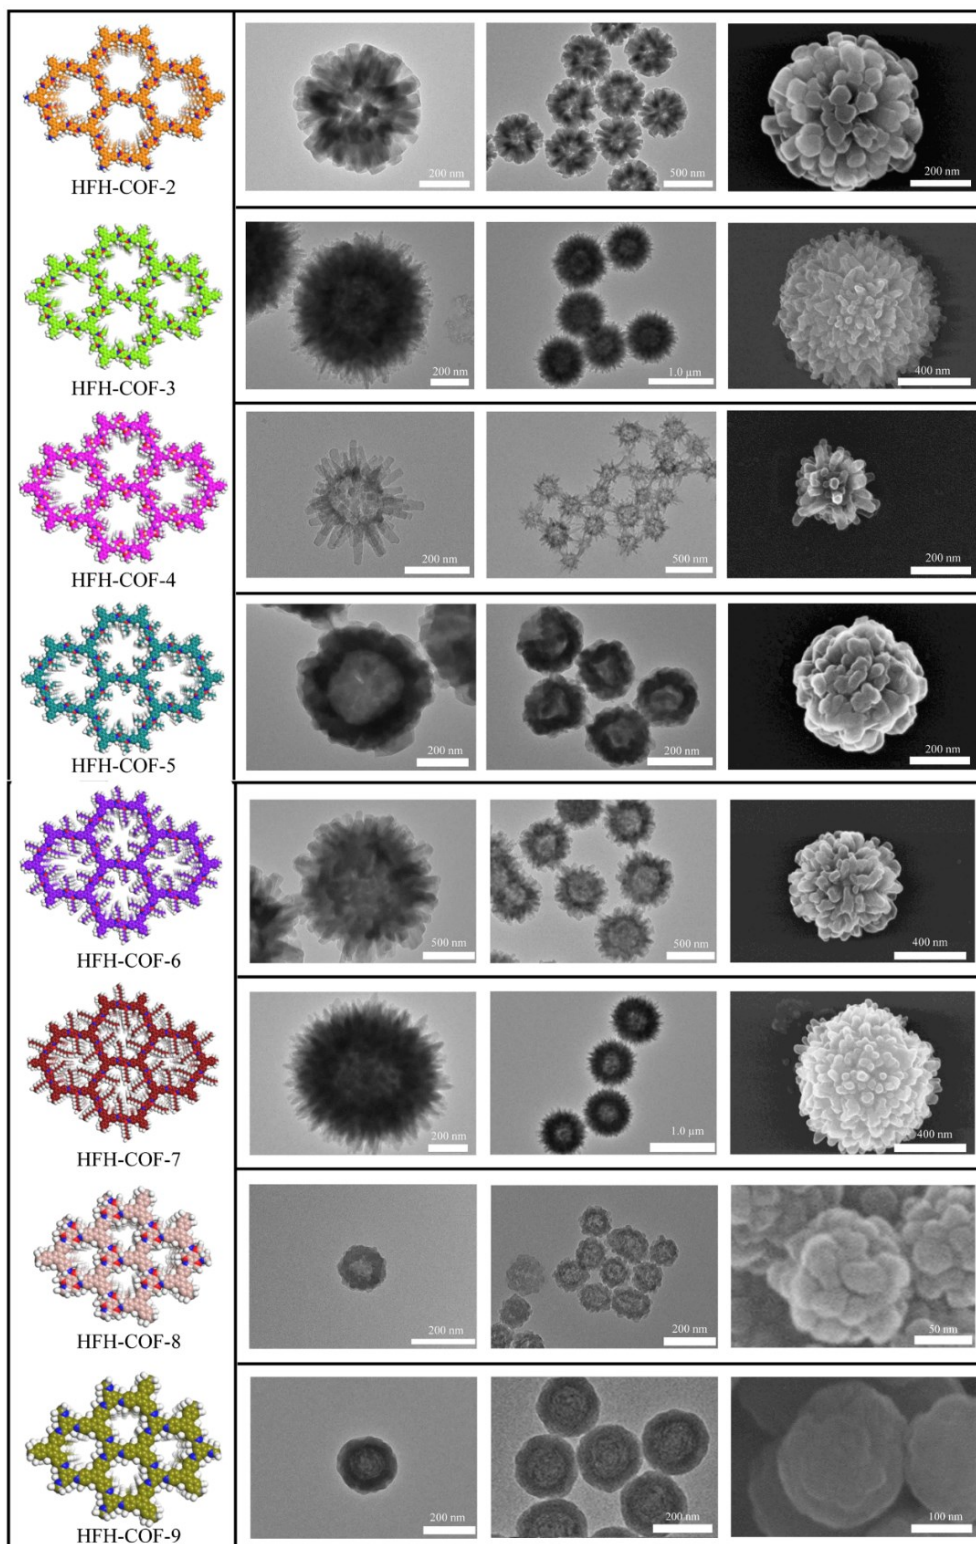

**Figure S13.** TEM and SEM images of a) HFH-COF-2, b) HFH-COF-3, c) HFH-COF-4, d) HFH-COF-5, e) HFH-COF-6, f) HFH-COF-7, g) HFH-COF-8, h) HFH-COF-9 synthesized in ACN solvent.

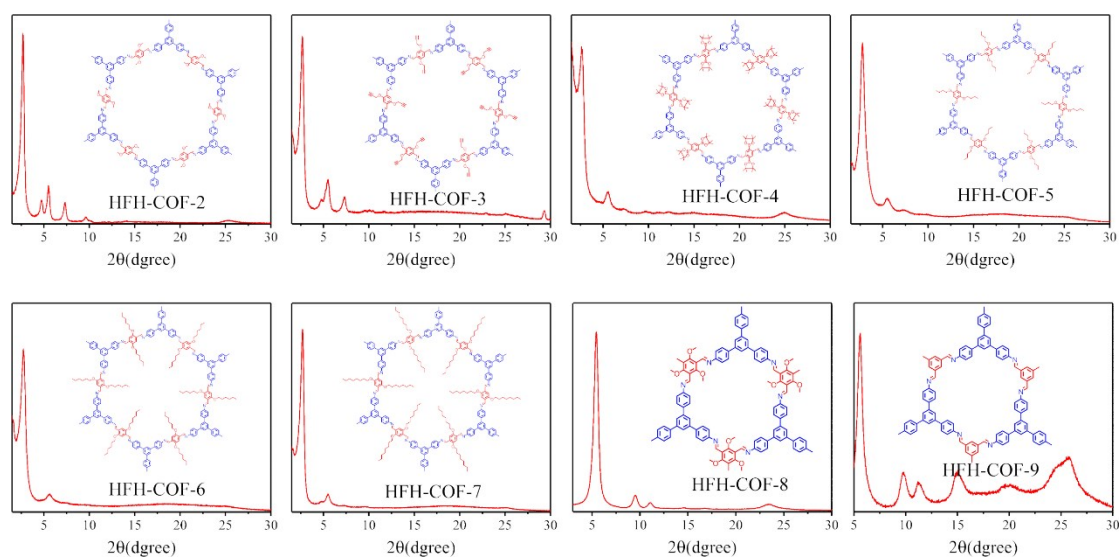

**Figure S14.** PXRD analysis of the different-class hierarchically flower-like hollow COFs.

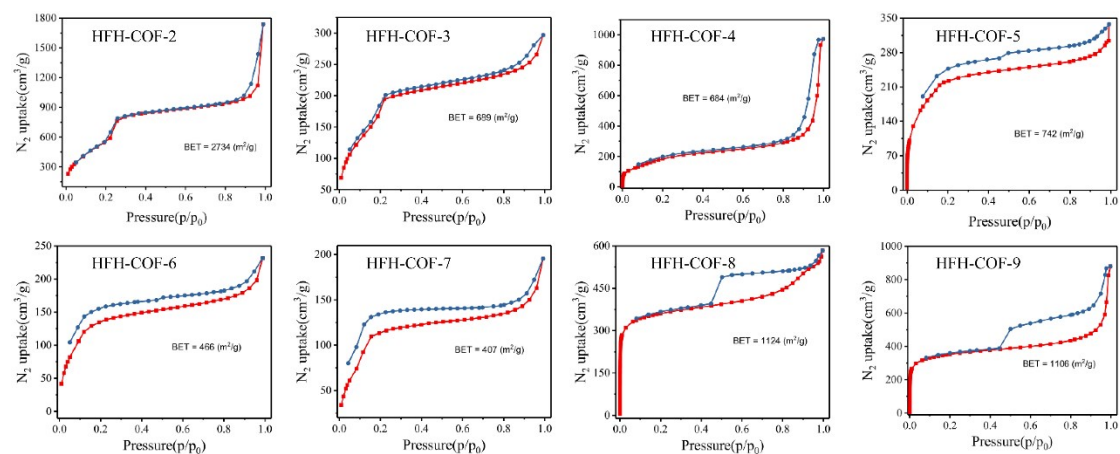

**Figure S15.**  $N_2$  adsorption analysis of the different-class hierarchically flower-like hollow COFs.

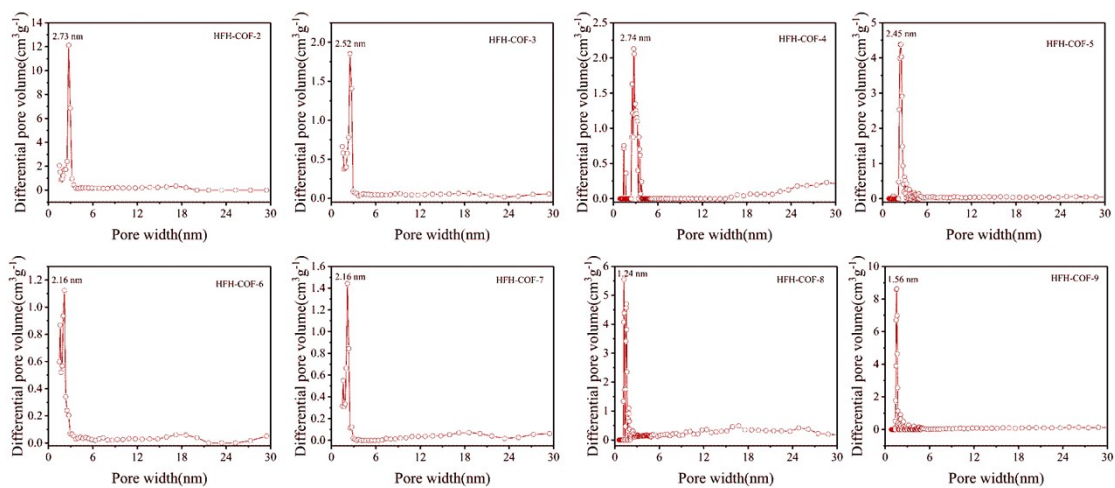

**Figure S16.** Pore size distribution profiles of the different-class hierarchically flower-like hollow COFs. Pore size distributions of the HFH-COF-1 were calculated by using the NLDFT model.

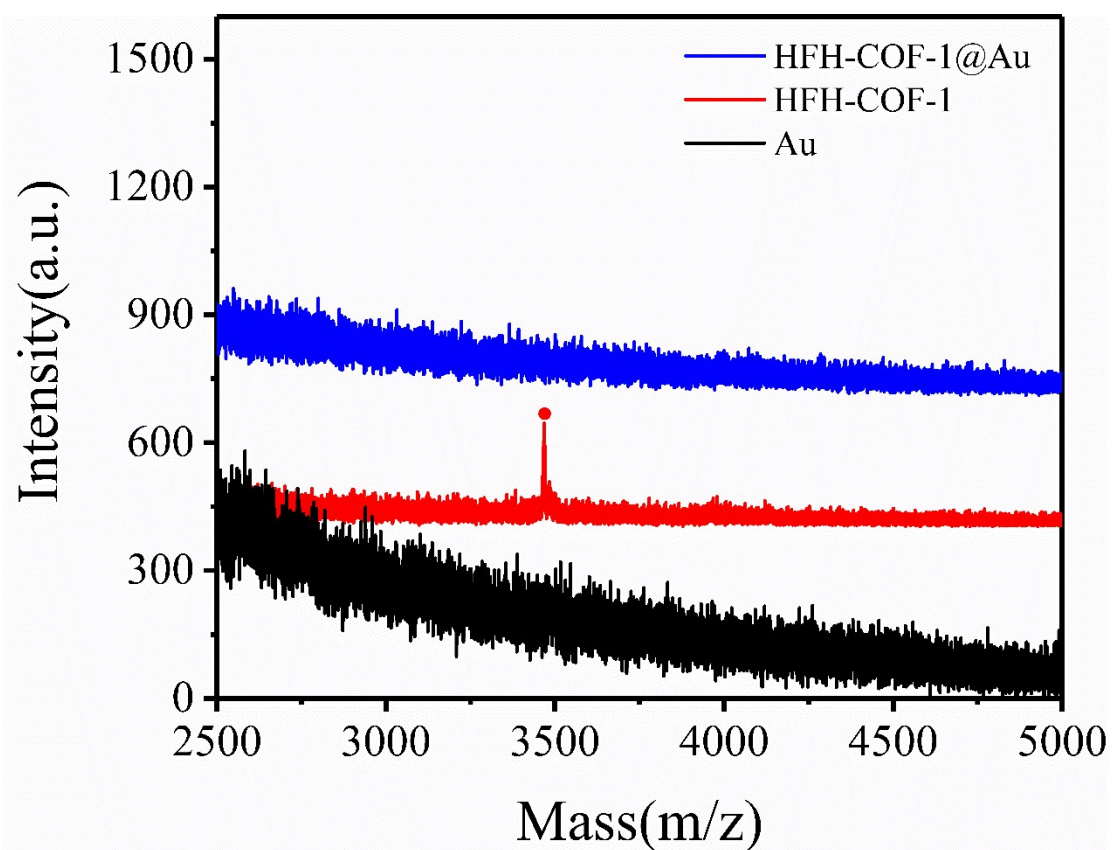

**Figure S17.** Mass spectra of the supernatant after enrichment of BNP (10 fmoL/ $\mu$ L,  $[M+H]^+$ ,  $m/z = 3465.4$ ) by HFH-COF-1@Au, HFH-COF-1, and Au, respectively ( $n=3$ , RSD < 10%). The peak of BNP is marked with red circles.



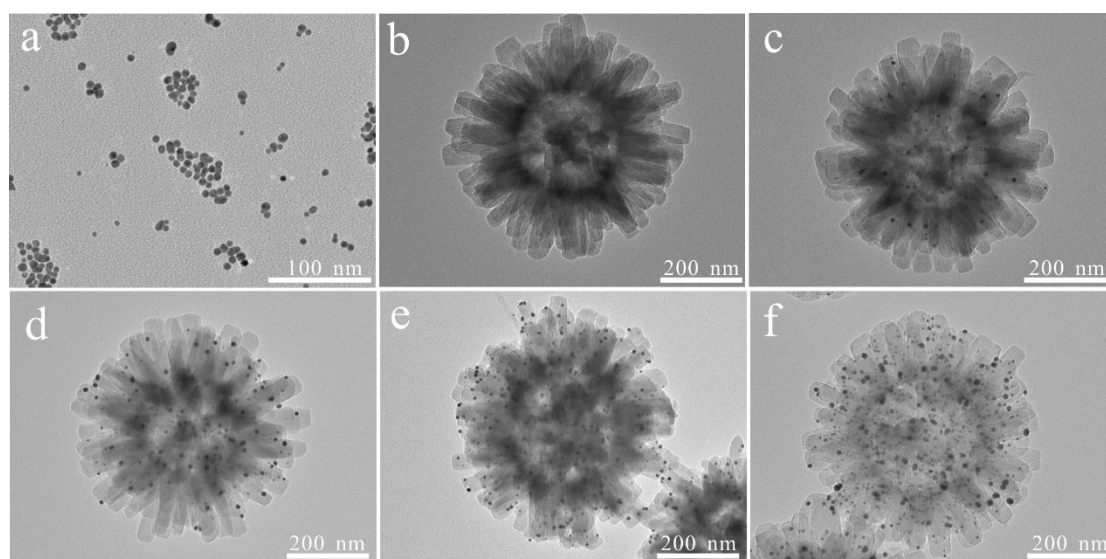

**Figure S18.** TEM images of a) Au nanoparticles, b) HFH-COF-1, c) HFH-COFs-1/Au (20:1.0, mg/mg), d) HFH-COFs-1/Au (20:1.5, mg/mg), e) HFH-COFs-1/Au (20:2.0, mg/mg), f) HFH-COFs-1/Au (20:2.5, mg/mg).

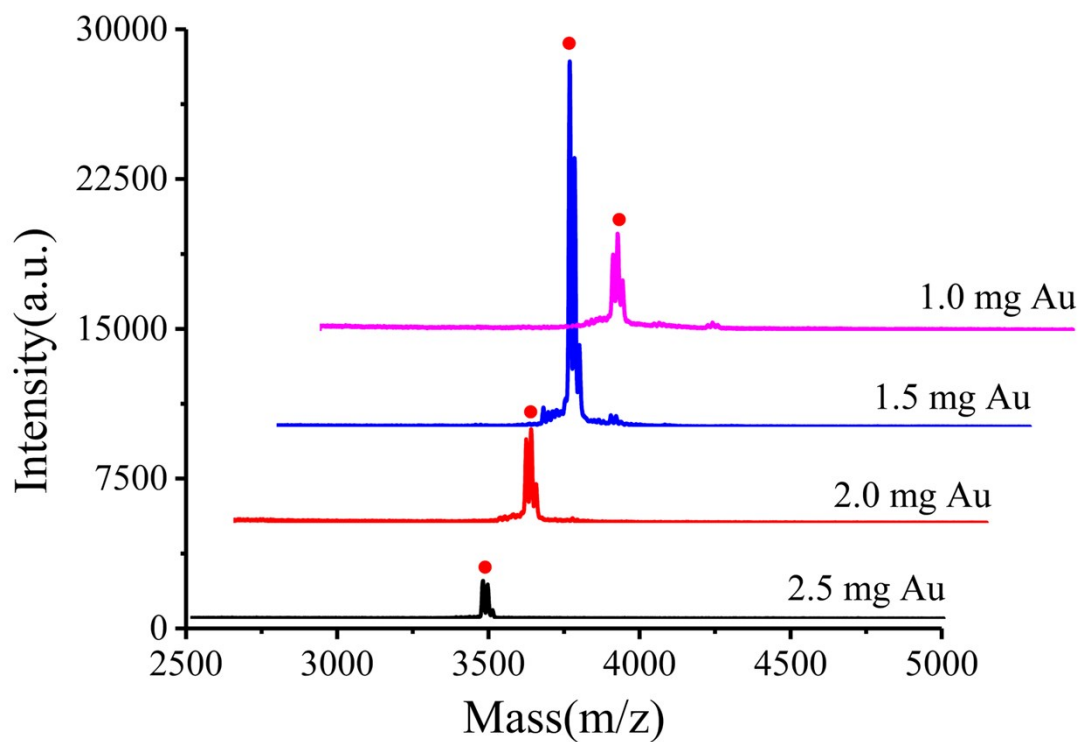

**Figure S19.** Mass spectra of BNP (10 fmoL/ $\mu$ L,  $[M+H]^+$ ,  $m/z = 3465.4$ ) after enrichment by HFH-COF-1@Au (HFH-COFs-1 loading different amounts of Au ) ( $n=3$ , RSD < 10%). The peaks of BNP are marked with red circles.

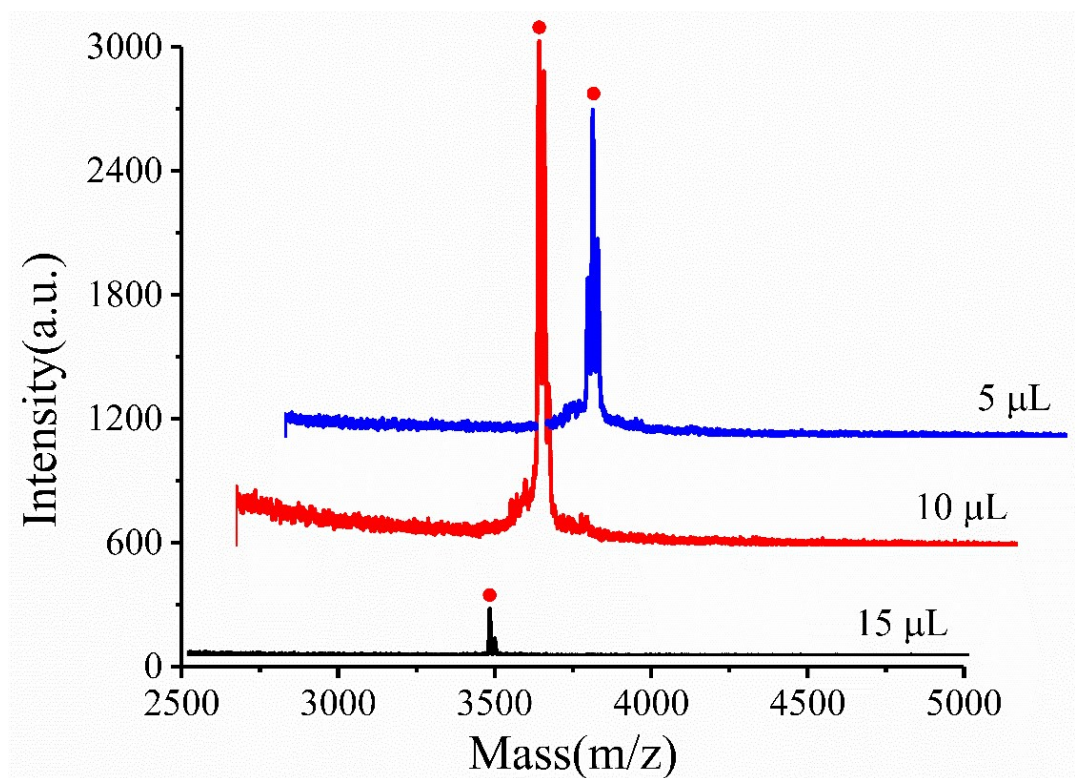

**Figure S20.** Mass spectra of the different volumes of DHB (30 mg/mL, 50%ACN:49% $\text{H}_2\text{O}$ :1% $\text{H}_3\text{PO}_4$ ) eluted after enrichment of BNP (10 fmol/ $\mu\text{L}$ ,  $[\text{M}+\text{H}]^+$ ,  $m/z = 3465.4$ ) by HFH-COF-1@Au (HFH-COFs-1/Au (20:1.5, mg/mg)) ( $n=3$ , RSD < 10%). The peaks of BNP are marked with red circles.

**Table S1.** Atomistic coordinates for the AA-stacking mode of HFH-COF-1 optimized using Forcite method.

| After refinement: space group P-1, a = b = 37.7898 Å, c = 3.7515 Å. |         |          |           |
|---------------------------------------------------------------------|---------|----------|-----------|
| Rwp= 8.52%, Rp= 7.10%                                               |         |          |           |
| Atom                                                                | x/a     | y/b      | z/c       |
| H1                                                                  | 1.12618 | -0.57656 | -0.0106   |
| H2                                                                  | 1.24325 | -0.46759 | 0.09154   |
| H3                                                                  | 1.13507 | -0.45753 | 0.06549   |
| H4                                                                  | 1.26688 | -0.41208 | 0.42864   |
| H5                                                                  | 1.31057 | -0.33675 | 0.45786   |
| H6                                                                  | 1.21944 | -0.32128 | -0.08881  |
| H7                                                                  | 1.17695 | -0.39593 | -0.15588  |
| H8                                                                  | 1.15837 | -0.603   | 0.3146    |
| H9                                                                  | 1.19128 | -0.6454  | 0.29044   |
| H10                                                                 | 1.29356 | -0.54787 | -0.26479  |
| H11                                                                 | 1.26057 | -0.50604 | -0.26132  |
| H12                                                                 | 1.25108 | -0.26428 | 0.32358   |
| H13                                                                 | 1.36426 | -0.21657 | 0.22602   |
| H14                                                                 | 1.31758 | -0.11408 | 0.20414   |
| H15                                                                 | 1.43067 | -0.06664 | 0.08464   |
| H16                                                                 | 1.3239  | -0.5797  | -0.000607 |
| H17                                                                 | 1.29426 | -0.7417  | 0.14549   |
| H18                                                                 | 1.37439 | -0.59488 | -0.22488  |
| H19                                                                 | 1.34478 | -0.75651 | -0.11197  |
| H20                                                                 | 1.37527 | -0.78933 | -0.32792  |
| H21                                                                 | 1.40983 | -0.82971 | -0.32879  |
| H22                                                                 | 1.51347 | -0.72953 | 0.20263   |
| H23                                                                 | 1.47843 | -0.68891 | 0.19633   |
| H24                                                                 | 1.43126 | -0.86483 | 0.06905   |
| H25                                                                 | 1.5404  | -0.87206 | -0.06246  |
| H26                                                                 | 1.54418 | -0.75583 | -0.19043  |
| H27                                                                 | 1.40401 | -0.92652 | -0.22791  |
| H28                                                                 | 1.3633  | -1.00183 | -0.15011  |
| H29                                                                 | 1.46463 | -1.00194 | 0.36495   |
| H30                                                                 | 1.50515 | -0.9266  | 0.31091   |
| H31                                                                 | 1.59536 | -0.83919 | -0.43543  |
| H32                                                                 | 1.67032 | -0.80366 | -0.46597  |
| H33                                                                 | 1.67747 | -0.69791 | 0.06365   |
| H34                                                                 | 1.6038  | -0.73371 | 0.12101   |
| H35                                                                 | 1.74033 | -0.68291 | 0.14796   |
| H36                                                                 | 1.78695 | -0.73489 | -0.34865  |
| H37                                                                 | 1.88625 | -0.5918  | 0.02734   |

|     |         |          |          |
|-----|---------|----------|----------|
| H38 | 1.93436 | -0.64389 | -0.44224 |
| H39 | 1.24844 | -0.68175 | 0.45171  |
| H40 | 1.42092 | -0.65556 | -0.51179 |
| H41 | 1.47509 | -0.58612 | -0.41264 |
| H42 | 1.4424  | -0.57594 | -0.10624 |
| H43 | 1.22599 | -0.75971 | 0.01574  |
| H44 | 1.19368 | -0.7505  | 0.33518  |
| H45 | 1.82967 | -0.58699 | 0.33565  |
| H46 | 1.76324 | -0.62105 | -0.23811 |
| H47 | 1.77493 | -0.57975 | 0.09564  |
| H48 | 1.84376 | -0.7393  | -0.66158 |
| H49 | 1.89783 | -0.74747 | -0.41813 |
| H50 | 1.90935 | -0.70664 | -0.08021 |
| H51 | 1.24765 | -0.16983 | 0.39595  |
| H52 | 1.23248 | -0.23683 | -0.14984 |
| H53 | 1.19518 | -0.22382 | 0.04676  |
| H54 | 1.43421 | -0.16083 | 0.03239  |
| H55 | 1.48692 | -0.10608 | 0.37456  |
| H56 | 1.44962 | -0.09292 | 0.56922  |
| H57 | 1.07352 | -0.49338 | 0.29194  |
| H58 | 0.99931 | -0.52718 | 0.23767  |
| H59 | 0.99782 | -0.62727 | -0.34285 |
| H60 | 1.07157 | -0.59238 | -0.32682 |
| C1  | 1.12496 | -0.51945 | 0.01861  |
| C2  | 1.14428 | -0.54336 | 0.01359  |
| C3  | 1.18691 | -0.52494 | 0.03911  |
| C4  | 1.21047 | -0.48177 | 0.0745   |
| C5  | 1.19223 | -0.4569  | 0.0887   |
| C6  | 1.14942 | -0.47624 | 0.05823  |
| C7  | 1.20685 | -0.5508  | 0.03009  |
| C8  | 1.21793 | -0.41089 | 0.1319   |
| C9  | 1.25623 | -0.39305 | 0.30452  |
| C10 | 1.28112 | -0.35004 | 0.32791  |
| C11 | 1.26776 | -0.32393 | 0.19507  |
| C12 | 1.22943 | -0.34117 | 0.02959  |
| C13 | 1.20501 | -0.38411 | -0.00588 |
| C14 | 1.18747 | -0.59078 | 0.18009  |
| C15 | 1.20625 | -0.61491 | 0.17094  |
| C16 | 1.24504 | -0.59942 | 0.02196  |
| C17 | 1.26451 | -0.55974 | -0.13123 |
| C18 | 1.24551 | -0.53578 | -0.12865 |
| C19 | 1.28271 | -0.25332 | 0.25901  |
| C20 | 1.31186 | -0.20818 | 0.2316   |
| C21 | 1.35396 | -0.19419 | 0.21855  |

|     |         |          |          |
|-----|---------|----------|----------|
| C22 | 1.38321 | -0.15195 | 0.20479  |
| C23 | 1.37006 | -0.12239 | 0.19324  |
| C24 | 1.32797 | -0.13639 | 0.21188  |
| C25 | 1.29873 | -0.17859 | 0.22447  |
| C26 | 1.39894 | -0.07743 | 0.14204  |
| C27 | 1.30194 | -0.61251 | 0.00979  |
| C28 | 1.31761 | -0.64189 | -0.00242 |
| C29 | 1.29432 | -0.68412 | 0.099    |
| C30 | 1.31138 | -0.7098  | 0.05772  |
| C31 | 1.35102 | -0.69456 | -0.07523 |
| C32 | 1.37442 | -0.65234 | -0.17429 |
| C33 | 1.35728 | -0.62672 | -0.13559 |
| C34 | 1.36674 | -0.72379 | -0.09317 |
| C35 | 1.42413 | -0.7363  | -0.05605 |
| C36 | 1.40491 | -0.77633 | -0.20336 |
| C37 | 1.4248  | -0.79944 | -0.20492 |
| C38 | 1.46426 | -0.78298 | -0.06074 |
| C39 | 1.48348 | -0.74275 | 0.0826   |
| C40 | 1.46357 | -0.71967 | 0.08226  |
| C41 | 1.48533 | -0.80761 | -0.06155 |
| C42 | 1.46337 | -0.85034 | 0.00367  |
| C43 | 1.48259 | -0.87428 | -0.00665 |
| C44 | 1.52508 | -0.85419 | -0.06228 |
| C45 | 1.54797 | -0.81113 | -0.11637 |
| C46 | 1.52744 | -0.78847 | -0.12661 |
| C47 | 1.45805 | -0.92016 | 0.036    |
| C48 | 1.59332 | -0.78951 | -0.15227 |
| C49 | 1.41754 | -0.94223 | -0.09033 |
| C50 | 1.39433 | -0.98518 | -0.05123 |
| C51 | 1.41125 | -1.00719 | 0.10334  |
| C52 | 1.45161 | -0.98563 | 0.22986  |
| C53 | 1.47473 | -0.94248 | 0.1983   |
| C54 | 1.61292 | -0.80888 | -0.31572 |
| C55 | 1.65561 | -0.78865 | -0.33631 |
| C56 | 1.67958 | -0.7489  | -0.19571 |
| C57 | 1.66016 | -0.72898 | -0.04012 |
| C58 | 1.6176  | -0.74926 | -0.0151  |
| C59 | 1.74992 | -0.69684 | -0.05435 |
| C60 | 1.79424 | -0.67859 | -0.12134 |
| C61 | 1.80867 | -0.70343 | -0.27004 |
| C62 | 1.85058 | -0.68916 | -0.30409 |
| C63 | 1.8791  | -0.6482  | -0.19718 |
| C64 | 1.86458 | -0.62325 | -0.05214 |
| C65 | 1.82272 | -0.6375  | -0.01819 |

|     |         |          |          |
|-----|---------|----------|----------|
| C66 | 1.92368 | -0.63026 | -0.24657 |
| C67 | 1.25359 | -0.70131 | 0.26957  |
| C68 | 1.41533 | -0.63538 | -0.3414  |
| C69 | 1.44579 | -0.59681 | -0.2851  |
| C70 | 1.22286 | -0.7395  | 0.2045   |
| C71 | 1.81098 | -0.60788 | 0.12545  |
| C72 | 1.78118 | -0.60292 | -0.01283 |
| C73 | 1.86228 | -0.71878 | -0.4487  |
| C74 | 1.89168 | -0.72427 | -0.30855 |
| C75 | 1.25533 | -0.18914 | 0.23484  |
| C76 | 1.22605 | -0.21855 | 0.03501  |
| C77 | 1.42661 | -0.14132 | 0.19152  |
| C78 | 1.45601 | -0.11147 | 0.38721  |
| C79 | 1.07941 | -0.5397  | -0.01436 |
| C80 | 1.05794 | -0.52159 | 0.13796  |
| C81 | 1.01539 | -0.54102 | 0.11219  |
| C82 | 0.99306 | -0.57908 | -0.06006 |
| C83 | 1.01398 | -0.59769 | -0.21031 |
| C84 | 1.05663 | -0.57791 | -0.1925  |
| N1  | 1.29474 | -0.28003 | 0.20758  |
| N2  | 1.26308 | -0.62532 | 0.02276  |
| N3  | 1.38594 | -0.05109 | 0.14453  |
| N4  | 1.40538 | -0.71101 | -0.05184 |
| N5  | 1.72324 | -0.72937 | -0.22875 |
| N6  | 1.9493  | -0.59856 | -0.05765 |

---
